# Supplementary material
Source: Springer Nature journal article supplement (https://www.springermedizin.de/resource/supplementary/13046_2013_730_MOESM4_ESM.pdf/9662822)

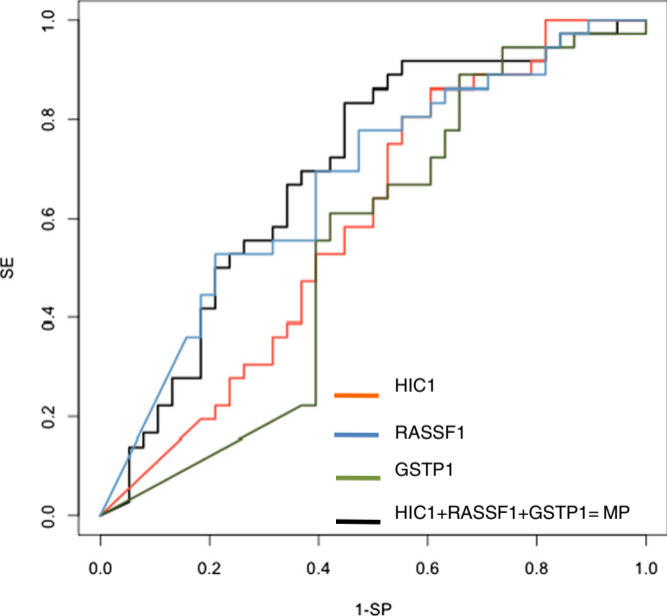

| Gene   | AUC    |
|--------|--------|
| HIC1   | 0.5917 |
| RASSF1 | 0.6725 |
| GSTP1  | 0.5409 |
| MP     | 0.6959 |

Supplement: MOESM4 [file 9662822]
